# Supplementary material for: Stage and tissue expression patterns of Schistosoma mansoni venom allergen-like proteins SmVAL 4, 13, 16 and 24
Source: PubMed Central journal article supplement (PMC5422958; doi:10.1186/s13071-017-2144-2), 2017-05-08
Supplement: 13071_2017_2144_MOESM1_ESM.pdf [file 13071_2017_2144_MOESM1_ESM.pdf]

**Table S1.** Set of primers/probes used to detect gene expression by qRT-PCR and WISH.

| <b>Sybr System</b>      |                                                                                                                                                                                                                                                                                                                                                                                                                                                                                                                                                                                                                                                                                                                                                                                                                                                                                                                                                                                                                                                                                                                                                                                                                                                                                                                                      |                              |                             |
|-------------------------|--------------------------------------------------------------------------------------------------------------------------------------------------------------------------------------------------------------------------------------------------------------------------------------------------------------------------------------------------------------------------------------------------------------------------------------------------------------------------------------------------------------------------------------------------------------------------------------------------------------------------------------------------------------------------------------------------------------------------------------------------------------------------------------------------------------------------------------------------------------------------------------------------------------------------------------------------------------------------------------------------------------------------------------------------------------------------------------------------------------------------------------------------------------------------------------------------------------------------------------------------------------------------------------------------------------------------------------|------------------------------|-----------------------------|
| Genes                   | <i>S. mansoni</i><br>Gene DB                                                                                                                                                                                                                                                                                                                                                                                                                                                                                                                                                                                                                                                                                                                                                                                                                                                                                                                                                                                                                                                                                                                                                                                                                                                                                                         | Forward primer (5'-3')       | Reverse Primer (5'-3')      |
| SmVAL4                  | Smp_002070                                                                                                                                                                                                                                                                                                                                                                                                                                                                                                                                                                                                                                                                                                                                                                                                                                                                                                                                                                                                                                                                                                                                                                                                                                                                                                                           | GGAAGGACAACGAGCAATCT         | CGTTTAGCTTGTTGTTTAGCTTTATT  |
| SmVAL6                  | Smp_124050                                                                                                                                                                                                                                                                                                                                                                                                                                                                                                                                                                                                                                                                                                                                                                                                                                                                                                                                                                                                                                                                                                                                                                                                                                                                                                                           | CTTATCATCCAAATTCACGTCATTTT   | AAAGGCCAATCCGAATCCA         |
| SmVAL7                  | Smp_070240                                                                                                                                                                                                                                                                                                                                                                                                                                                                                                                                                                                                                                                                                                                                                                                                                                                                                                                                                                                                                                                                                                                                                                                                                                                                                                                           | TGGAGTCATAAATTGGCTGAAATG     | CAGATGCTGCTTGTCTAACTTTAGGA  |
| SmVAL13                 | Smp_124060                                                                                                                                                                                                                                                                                                                                                                                                                                                                                                                                                                                                                                                                                                                                                                                                                                                                                                                                                                                                                                                                                                                                                                                                                                                                                                                           | TGTGATGAATATGGAGAAAATTTGG    | TGAATCTCATCGTACCAGTTTCGT    |
| SmVAL16                 | Smp_124070                                                                                                                                                                                                                                                                                                                                                                                                                                                                                                                                                                                                                                                                                                                                                                                                                                                                                                                                                                                                                                                                                                                                                                                                                                                                                                                           | AGGATTCGGTCTGCATTATCC        | CATCTCTTGGTGGAGCAGTTATCTT   |
| SmVAL24                 | Smp_141550                                                                                                                                                                                                                                                                                                                                                                                                                                                                                                                                                                                                                                                                                                                                                                                                                                                                                                                                                                                                                                                                                                                                                                                                                                                                                                                           | GAAAGAATCGAACTACTATGACCACAAT | TGCTTCAACTATCTGCTTGTAAGTGTT |
| 18S<br>Ribosomal        | sma.18s.1                                                                                                                                                                                                                                                                                                                                                                                                                                                                                                                                                                                                                                                                                                                                                                                                                                                                                                                                                                                                                                                                                                                                                                                                                                                                                                                            | TCGCGACGGATCTTTCA            | CCGGAATCGAACCCTGATTC        |
| SmActin                 | Smp_161930                                                                                                                                                                                                                                                                                                                                                                                                                                                                                                                                                                                                                                                                                                                                                                                                                                                                                                                                                                                                                                                                                                                                                                                                                                                                                                                           | CGTTGGACGACCTCGACAT          | TTTGTGTAGGTTGGACGCTCTATATC  |
| <b>Probes Templates</b> |                                                                                                                                                                                                                                                                                                                                                                                                                                                                                                                                                                                                                                                                                                                                                                                                                                                                                                                                                                                                                                                                                                                                                                                                                                                                                                                                      |                              |                             |
| SmVAL4                  | aagttatcgggaaggacaacgagcaatctataatttccataaaaaagttcgtaaagatgtaaaaaattgcaggatacctggtcaac<br>ctccagctaaaaatctaacaaagttgaaatggaataaaactattagctaataaagctaaacaacagctaaacgatgtaaatatga<br>ttcaaatgatccaaatgatTTTTATTATTGGGGATTTGAAATCAATTGGACAAAATTTAGCCGATTATCCAACAATTGAAGGTGCA<br>atgaaagattgggttagaagagtataaaaaattataatTTTGAAAAGAATCAATGTAATGGTGATTGTAAAAATTATAACAGATGG<br>TTGGAAATACCCTGAAGAAATAGGCTCGGTTATGAAAAATGTGGAAAGAATTTGATTGTTTGCAATTATGCACCAGGGGA<br>ctctgaagatagaccatagaagctaaaccagaaagtaaatgtaataaatcagaataa                                                                                                                                                                                                                                                                                                                                                                                                                                                                                                                                                                                                                                                                                                                                                                                                                 |                              |                             |
| SmVAL6                  | atgattaatgaacgTTTTAATGATCAAGCTATACGGGAACATAATCGACTTCGTTCTCTACATGGATGTCCAGAACTTCAATTGG<br>atgaagacttaatgatttcagcacaAAAAATGGGCTGAAAATTTAGCCGCTGCCGAAAAATTATATCATAGTAATTATAATGATGA<br>tggggaaaatttggcattcaaaatgtctgcatcaccatgtcaataaacagggtgaagaagtttcacagacatggatagtgagatt<br>gactatcatgactTTTACTCAATCTTATCATCCAAATTCACGTCATTTTACTCAGATGATTTGGAAATCTACAACAGAGCTGGAT<br>tcggattggcctTTTAGTCAAGATCAAACGAAAGCATAGTTGTTGGACGTTATTTACTGAGGTAACAAAAGGGGATTTCCGGATG<br>gaatgtaccacattatcaaggaattaaaagatctgaaaagtattgattcattggatcgtaattcaattagatcaagctcatagacga<br>tcatttagagaaagtctaggattatcagaagatgcaaatgttactgggatcatacaccatagcacctgaaggacactctttaa<br>taaacgaagatgaacgctctagaactggtcaatacgtagtggagatttcaacggtccagacctacttcaTTTTCAATAATGA<br>tgatatacattataaatctgtatatacaAAAAAGTTCCAGAAGATTTACGACCTAAAACCTATAATGTCACTACTACTAGTTTACC<br>aatacagatgatgcacataattcattatgtagtccaacagtgatcaattttaaTTTTATGAATTCAGATGAACGTCCAAATGACT<br>TTTTCTGGATCCAGTCGTATGTCTATTAGAACATCAGTAAGACGCCAACAAGAAGTTCAACACCAGTGTGAATGGACACTCATA<br>tgaaagagagagtagtatttcttcaaatggaagagctaaactatctaaaagatgatcaatatggaagagctagttatatcagaat<br>gatcaatctggaagatctagttatatgaaagatgaacaatatggaatgcaaatgatgataatagtagtacattaaggggttcga<br>gtgtttctggcaagggatacaaatattgttctactgttaacaacggtggacataacagggtatatttccgagaatgtgagacaatat<br>gagtggttggttattgaaagagattatagaagatattga |                              |                             |
| SmVAL7                  | tatagatggtatacacaAAAactctgaattattagctttacacaatgcataatagaaggaatataaaaatattggttaattggtcgtgatc<br>aaccacaagtgatgagtagcttaaaactaacatggagtcataaaattggctgaaatggctcaggaatgggcattacaatgtgtgcc<br>aagacgaagtaacatgactatgaggaaaaggttcgaaatggacatatgttggcagagatcgctttcgttctaaagtttagacaa<br>gcagcatctgtatggtttgaacaacacaagaattacaatTTTCGAAAACAATACTTGTGAGGCAATAAAAACCTTGTGCAGATTACA<br>aacaattagctTTTCGCCGATACCACACATATTGGATGTGGTTATGCAATGTGTTTTAATCTAACAGGACTAGATAAAGTTTTGT<br>TGTTCGAACCTATGGACCAGGGGGTAAATATGCCAATAGACAACCCTATGATCCTATATATCCTGAAGATCCATACTACCTCCA<br>tga                                                                                                                                                                                                                                                                                                                                                                                                                                                                                                                                                                                                                                                                                                                                                                     |                              |                             |
| SmVAL13                 | atggtagatgaacaattaaatcatgatgcattgaatgaacataatcgattacgtgcattgcacggatgtcctccattaaaaatag<br>atcgaagacttgctagagaagcacaagcttgggctgaaaatcttgcacgTTTTAAAAATTATGGAACATAGTATCTGTGATGAATA<br>tggagaaaatttggcatcagcacaatctactggaaaagcggaaatgaccggagctagagcgacacgaaactggtagcatgagatt<br>cattatcacaattTTTAAATAACAGTTTCAAAGTCAGTCAGGTCATTTTACACAGCTTATCTGGAAGAATACATCAAAGCAGGAT<br>TTGGCATTCAACATTCAAGTGTGATGGCCATCATGTTTTTATAGTAGGACGTTATGAGCCACCTGGGAATGTAATGGTCAATTTTT<br>AGAAAATGTACCTCCACCTATCCATGGACAGTCAACTCCAAATCTAAAGTCCCTTCTTACAAACATAATGAACAGAATGGTCCA<br>CGAAGAACCTATCAAGATGAAGTATTGTTTCGAGAGACAGATAGAAAAGATCAAAATGGTTCAAATCATATTACGTTGATAG                                                                                                                                                                                                                                                                                                                                                                                                                                                                                                                                                                                                                                                                                            |                              |                             |

---

atagttctaaacgaagcaggtcagatgaaactataaccaaacaaaaacgaagtacgtatcattagagcggagagaagaaacgtcaacg  
aagatgtgcaaagaggtgtagtattatgtaa

---

SmVAL16

atgataataaataaacttaataaggaggtatacaggctcataatgaacttagagcgttacatggttgtccagaaataagttatg  
attcaaaaactggctagtgtattctcaaaagtgggctgaacatttggcttcaataaattggttacaacatagtaaaggagatgatta  
tggtgaaaatthagcatttcaaatgtctacagccggtgcatcattgaatggtcgtgaagcaactcgaaattggtacgatgaatt  
attcaacatgattttaatggacaaaatcaacctgggacaggacattttactcaagtaatttggagtcactattaagcaggat  
tcggttctgcattatccaaa

---

SmVAL24

ttggaccacaggaggcacaactcatgctgagtagacataatgagcatcgagcataccgaaaactgtgtggcgaagaggacatag  
tgccagcagaggaaatactacagcctcttgagtgggacgataaattggctgccgctgctcaaagttggtctgaaaaatgcaatcc  
atgtgacgaagaaccgattggaaatgttggtaaatgggattcggttggcgaattccgctattcattctgagttggcagaagct  
ggtgcatattggatgaaagaatcgaactactatgaccacaattcagacctctgtgagccatcgcatcactgcaacacttacaagc  
agatagttgaagcaciaaacggcgtacgtgggatgcggttataccagatgtgaagaatatgaatatccatcaaacatggtgatcgc  
ttgttactactcacctaaagtgatgagtggtccaccgtacactgacggaacgaacggacgatgcggtatctgaatga

---
